# Supplementary material
Source: PubMed Central journal article supplement (PMC4531268)
Supplement: peds.2013-3500_peds.2013-3500SupplementaryData.pdf [file peds.2013-3500_peds.2013-3500SupplementaryData.pdf]

## Supplemental Information

### FS-PT YEAR ONE APPENDICES

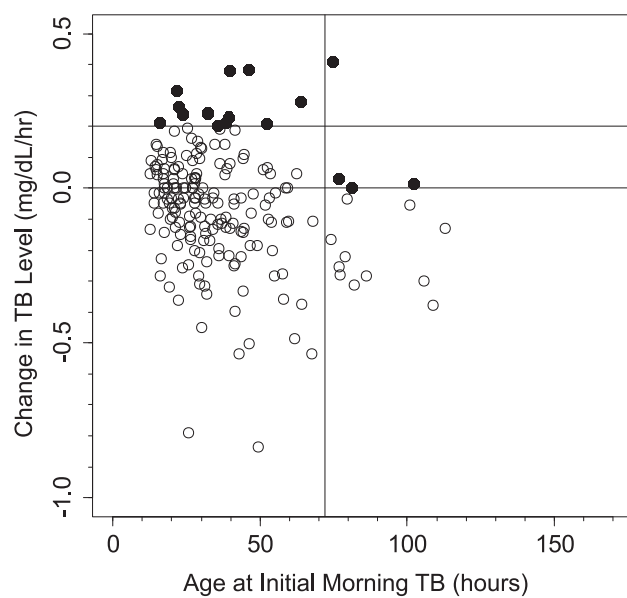

Figure. Change in TB level after a day of FSPT treatment as a function of age at the initial morning TB measurement, for the 195 evaluable treatment days. The vertical line marks 72 hours of age. The horizontal lines mark TB change rates of 0.2 and 0 mg/dL/hr. Open circles: effective treatment days. Filled circles: ineffective treatment days.

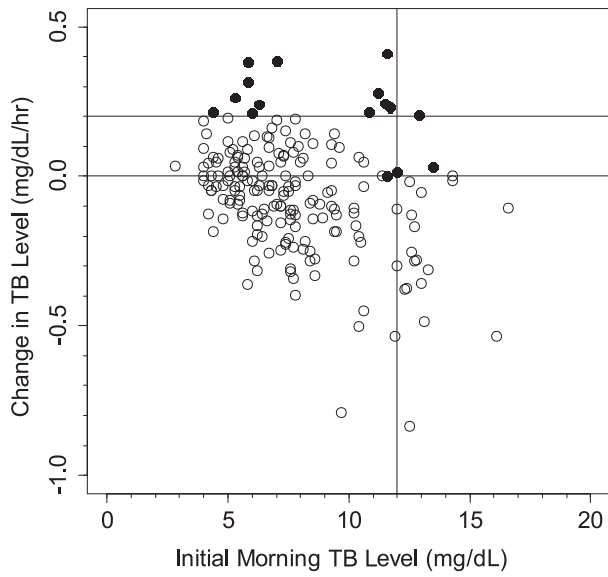

Figure. Change in TB level after a day of FSPT treatment as a function of initial morning TB level, for the 195 evaluable treatment days. The vertical line marks TB = 12 mg/dL. The horizontal lines mark TB change rates of 0.2 and 0 mg/dL/hr. Open circles: effective treatment days. Filled circles: ineffective treatment days.

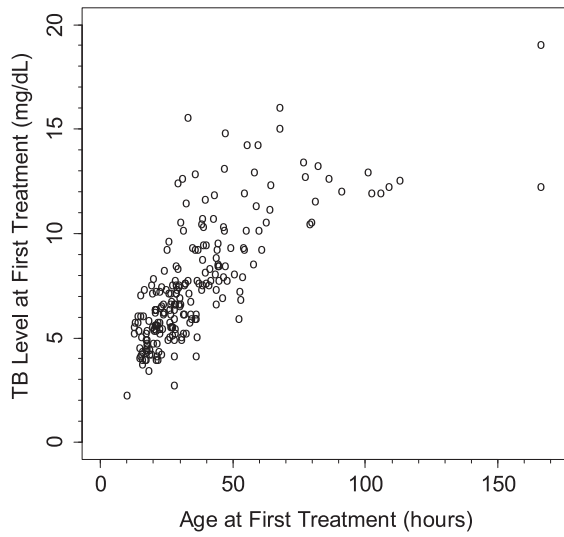

Figure: Age and TB Level at First FS-PT
